# Supplementary material for: Early life factors and variation in adult kidney function in the Swedish LifeGene cohort
Source: Springer Nature journal article supplement (doi:10.1038/s41598-025-88928-y), 2025-02-11
Supplement: MOESM1 [file 41598_2025_88928_MOESM1_ESM.pdf]

## **Supplemental materials**

**Supplemental Figure S1** Mean values of creatinine-based glomerular filtration rate ( $\text{eGFR}_{\text{cr}}$ ) in postnatal mismatch subgroups.

**Supplemental Table S1. Description of study variables and data sources**

| Variable                               |                                                                                                   | Assessment method                                                                                                                                                                                            | Data source                              |
|----------------------------------------|---------------------------------------------------------------------------------------------------|--------------------------------------------------------------------------------------------------------------------------------------------------------------------------------------------------------------|------------------------------------------|
| Anthropometric data                    | height (m), waist circumference (WC, cm)                                                          | manual tape                                                                                                                                                                                                  | The LifeGene Study dataset <sup>21</sup> |
|                                        | weight (kg)                                                                                       | calibrated scale                                                                                                                                                                                             |                                          |
|                                        | body mass index (BMI)                                                                             | weight(kg)/height(m) <sup>2</sup>                                                                                                                                                                            |                                          |
| Bioimpedance body composition analysis | fat mass (kg)                                                                                     | bioimpedance analysis, Tanita BC-418 MA, Japan                                                                                                                                                               |                                          |
|                                        | fat mass index (FMI)                                                                              | fat mass(kg)/height(m) <sup>2</sup> ; bioimpedance analysis, Tanita BC-418 MA, Japan                                                                                                                         |                                          |
| Blood pressure                         | systolic blood pressure (mmHg), diastolic blood pressure (mmHg)                                   | manual device, performed by trained medical personnel                                                                                                                                                        |                                          |
| Blood samples                          | plasma creatinine (mmol/L) (Li-Hep with gel plug), serum cystatin C (mg/L) (Li-Hep with gel plug) | Unilabs, St. Göran Hospital, Stockholm, Sweden, and Department of Clinical Chemistry, Karolinska University Hospital, Stockholm, Sweden. Samples analyzed during the period from 2009-10-07 until 2010-03-31 |                                          |
| Socio-demographic and lifestyle data   | age, sex, smoking, and snuff habits (current, former, non-smoker)                                 | web-questionnaire                                                                                                                                                                                            |                                          |
| Fetal early life factors               | birth weight (g) (BW), birth length (cm) (BL), head circumference (cm)                            | calibrated scale and manual tape, performed by a midwife                                                                                                                                                     | The Swedish Medical                      |

|                  |                                                      |                                                                                                                            |                                 |
|------------------|------------------------------------------------------|----------------------------------------------------------------------------------------------------------------------------|---------------------------------|
|                  | (HC), placenta weight (g)<br>(PW)                    |                                                                                                                            | Birth<br>Register <sup>22</sup> |
|                  | gestational age (weeks)<br>(GA)                      | estimated either by date of the last menstruation period, by ultrasound when available, or from a clinical record at birth |                                 |
| Maternal factors | maternal age at delivery                             | calculated from the first six digits in mother's personal identity number                                                  |                                 |
|                  | maternal weight (kg) at pregnancy start and delivery | measured with a calibrated scale when wearing light indoor clothes                                                         |                                 |
|                  | maternal height (cm)                                 | self-reported                                                                                                              |                                 |
|                  | maternal weight gain during pregnancy                | weight gain (kg) = weight at delivery (kg) – weight at pregnancy beginning (kg)                                            |                                 |

**Supplemental Table S2. Maternal country/region of birth.**

| Country/region of birth      | Frequency | Percent |
|------------------------------|-----------|---------|
| Swedish                      | 10797     | 88.7    |
| Other Scandinavian countries | 615       | 5.1     |
| African                      | 45        | 0.4     |
| Asian                        | 199       | 1.6     |
| European                     | 341       | 2.8     |
| North American               | 36        | 0.3     |
| South American               | 69        | 0.6     |
| Former Soviet Union          | 21        | 0.2     |
| Oceania                      | 2         | 0.0     |
| Other                        | 9         | 0.1     |
| Missing data                 | 33        | 0.3     |
| Total                        | 12167     | 100.0   |

**Supplemental Figure 1. Mean values of creatinine-based glomerular filtration rate (eGFR<sub>cr</sub>) in postnatal mismatch subgroups.**

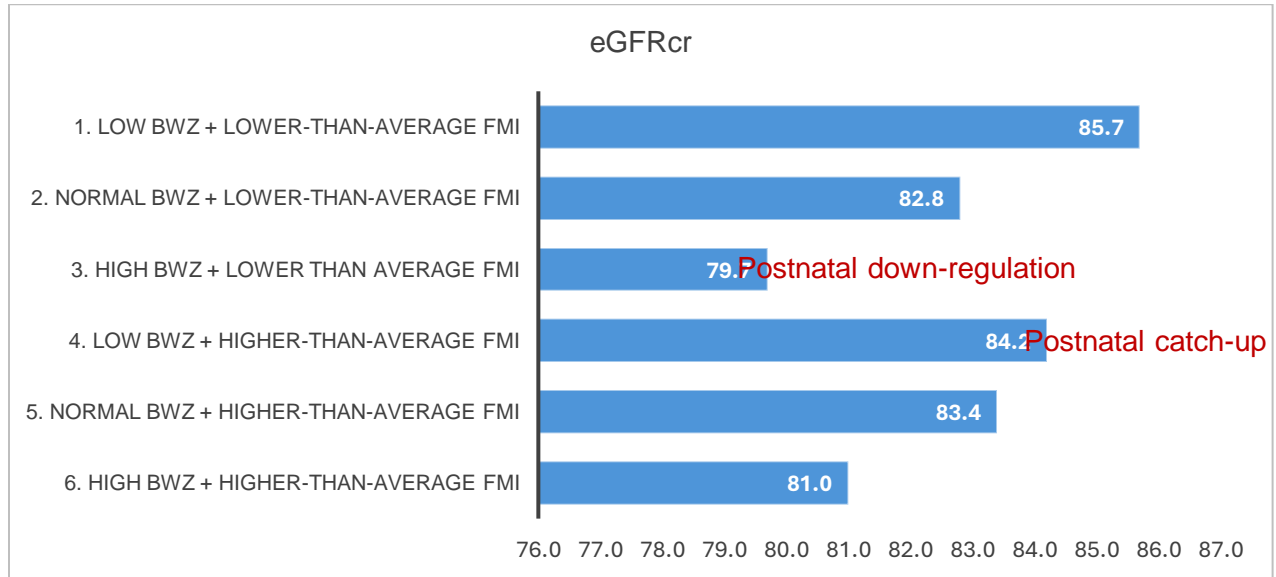

Abbreviations: eGFR<sub>cr</sub>, estimated creatinine-based glomerular filtration rate; BWz, birth weight z-score; FMI, fat mass index. P- values for group comparison: group 1 vs group 2, p=0.001; group 1 vs group 3, p<0.001; group 1 vs group 4, p=0.933; group 1 vs group 5, p=0.047; group 1 vs group 6, p<0.001; group 2 vs group 3, p<0.001; group 2 vs group 4, p=0.804; group 2 vs group 5, p=0.415; group 2 vs group 6, p=0.143; group 3 vs group 4, p<0.001; group 3 vs group 5, p<0.001; group 3 vs group 6, p=0.966; group 4 vs group 5, p=0.999; group 4 vs group 6, p=0.038; group 5 vs group 6, p=0.008.
